# Supplementary material
Source: publisher figshare collection journal article supplement (https://acs.figshare.com/ndownloader/files/8340275)

## ASSOCIATED CONTENT

### **Molecular Approach of the Synergistic Effect on Astringency Elicited by Mixtures of Flavanols**

Alba María Ramos-Pineda<sup>a</sup>, Ignacio García-Estévez<sup>a,b</sup>, Natércia F. Brás<sup>c</sup>, Eva M. Martín del Valle<sup>d</sup>, Montserrat Dueñas<sup>a</sup>, María Teresa Escribano Bailón<sup>a\*</sup>

<sup>a</sup>Grupo de Investigación en Polifenoles (GIP), Facultad de Farmacia, University of Salamanca, Salamanca, Spain

<sup>b</sup>LAQV, REQUIMTE, Faculdade de Ciências, Universidade do Porto, Porto, Portugal

<sup>c</sup>UCIBIO, REQUIMTE, Faculdade de Ciências, Universidade do Porto, Porto, Portugal

<sup>d</sup>Department of Chemical Engineering University of Salamanca, Salamanca, Spain.

**\*Corresponding author:** María Teresa Escribano-Bailón

**Phone:** +34 923 294 537

**e-mail:** [escriban@usal.es](mailto:escriban@usal.es)

**Table S1**

The binding of eight molecules (CAT and/or EC) to four IB7<sub>14</sub> PRP fragments was analysed by number of flavanols bound in simultaneous to each peptide throughout the first 25 ns of simulations.

| System |                | 1 flavanol | 2 flavanols | 3 flavanols |
|--------|----------------|------------|-------------|-------------|
| CAT    | IB714_1        | 0.1        | -           | -           |
|        | IB714_2        | 3.7        | -           | -           |
|        | IB714_3        | 7.9        | -           | -           |
|        | IB714_4        | 3.9        | -           | -           |
|        | <i>average</i> | 3.9        | -           | -           |
|        | <i>sum</i>     | 15.6       | -           | -           |
| EC     | IB714_1        | 3.3        | 0.0         | -           |
|        | IB714_2        | 1.2        | 0.0         | -           |
|        | IB714_3        | 6.1        | 0.1         | -           |
|        | IB714_4        | 1.5        | 0.1         | -           |
|        | <i>average</i> | 3.0        | 0.1         | -           |
|        | <i>sum</i>     | 12.0       | 0.2         | -           |
| CAT+EC | IB714_1        | 13.3       | 0.5         | 0.0         |
|        | IB714_2        | 5.0        | 2.8         | 0.7         |
|        | IB714_3        | 7.1        | 0.0         | 0.0         |
|        | IB714_4        | 5.0        | 0.0         | 0.0         |
|        | <i>average</i> | 7.6        | 0.8         | 0.2         |
|        | <i>sum</i>     | 30.4       | 3.3         | 0.7         |

**Figure S1.** Total chromatographic salivary profile (upper) and chromatographic profiles of the fractions 1, 3, 4 and 7 that underwent significant changes after addition of CAT + EPI (---) and CAT (—) or EPI (---). See table 1 for the identification of the fractions.

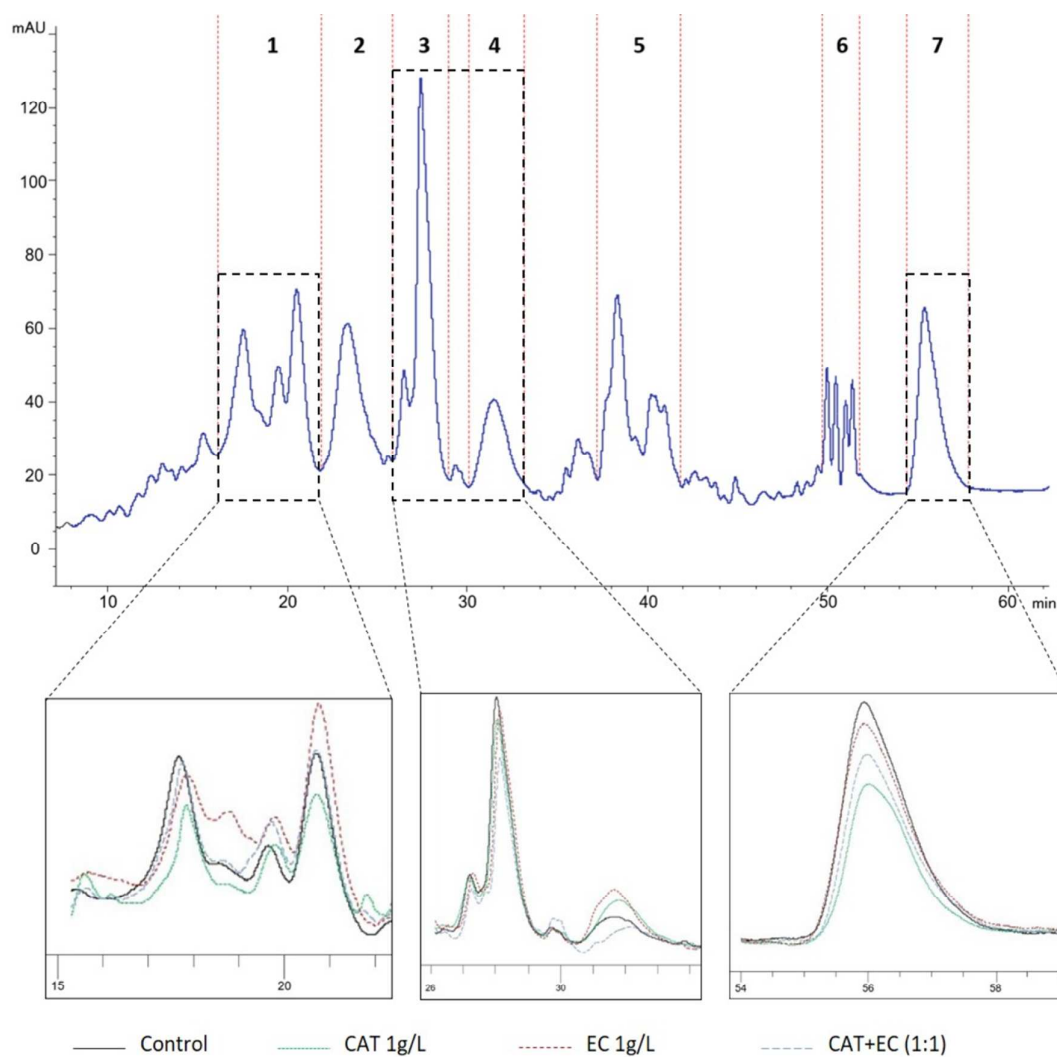

**Figure S2.** Enlarged illustration of representative geometries of the binding of different flavanols to one IB714 peptide extracted from MD simulations of the (IB714)<sub>4</sub>:(CAT)<sub>8</sub>, (IB714)<sub>4</sub>:(EC)<sub>8</sub> and (IB714)<sub>4</sub>:(CAT)<sub>4</sub>:(EC)<sub>4</sub> systems. The peptides are depicted with sticks, and are colored by element type. The CAT and EC molecules are depicted with balls and sticks representation and are colored by element type (except the CAT compounds in the third system that are colored in orange).

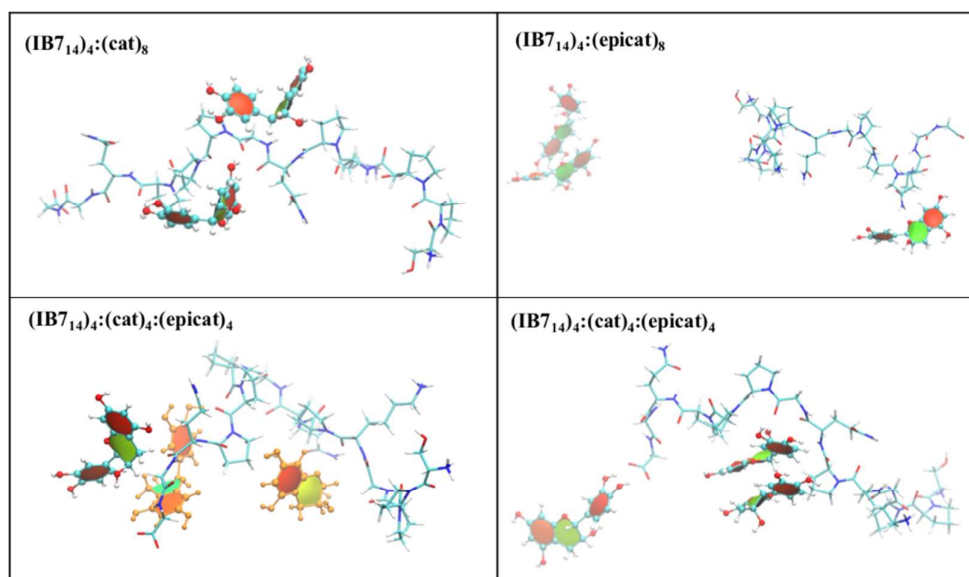

Supplement: Supplementary file 1 [file 8340275]
